# Supplementary material for: Ultrafast chemical aerosol flow synthesis of biocompatible fluorescent carbon dots for bioimaging
Source: Royal Society of Chemistry journal article supplement (doi:10.1039/c4tb01004c), 2014-08-22
Supplement: c4tb01004c1.pdf [file c4tb01004c1.pdf]

## Supporting information

### Ultrafast chemical aerosol-flow synthesis of biocompatible fluorescent carbon dots for bioimaging

Changhui Fu,<sup>a,†</sup> Li Qiang,<sup>ab,‡</sup> Tianlong Liu,<sup>a</sup> Longfei Tan,<sup>a</sup> Haitang Shi,<sup>ab</sup> Xue Chen,<sup>ab</sup> Xiangling Ren<sup>a</sup> and Xianwei Meng<sup>a\*</sup>

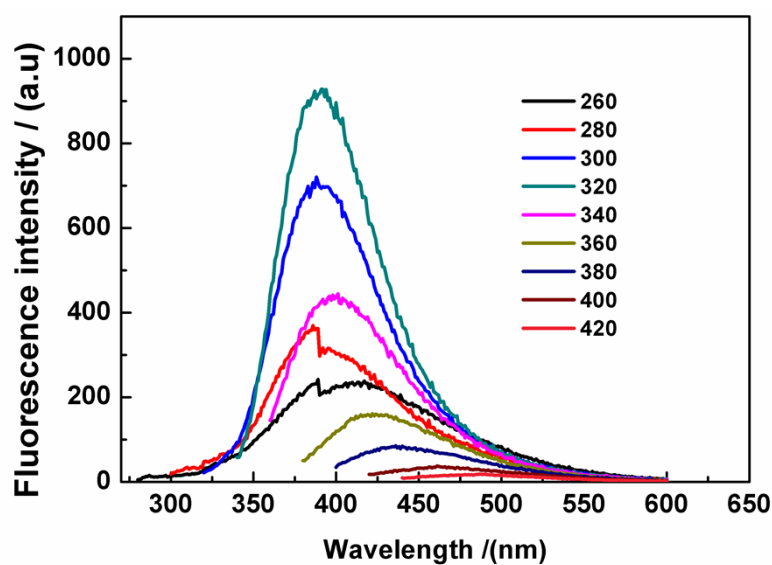

Fig. S1 Emission spectra of the CDs excited at different excitation wavelengths from 260 to 420 nm.
